# Supplementary material
Source: PubMed Central journal article supplement (PMC5479626)
Supplement: 08bc9a805bc53381de511530c63f7c9a_HAEMATOL-2016-149914v3-Roy.pdf [file 08bc9a805bc53381de511530c63f7c9a_HAEMATOL-2016-149914v3-Roy.pdf]

# Uncoupling of the Hippo and Rho pathways allows megakaryocytes to escape the tetraploid checkpoint

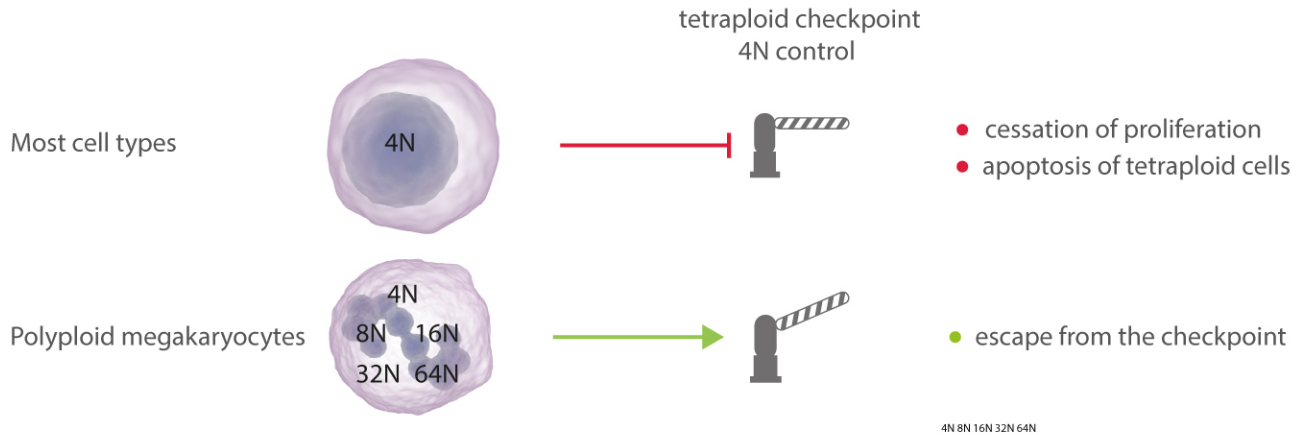

- Hippo pathway is functional but is not induced by tetraploidy

|               |            |   |                           |   |
|---------------|------------|---|---------------------------|---|
| Hippo pathway | present    | ✓ | activated                 | ✗ |
|               | functional | ✓ | coupled from Rho activity | ✗ |

- Increased expression of YAP target genes

YAP knockdown

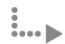

- ↓ mitochondrial mass in polyploid megakaryocytes
- ↓ expression of PGC1 $\alpha$  (important mitochondrial biogenesis regulator)
