# Supplementary material
Source: PubMed Central journal article supplement (PMC5479626)
Supplement: dc506ff0bfb78a82becf4a31aebe6cfc_2016_149914-Disclosures_and_Contributions.pdf [file dc506ff0bfb78a82becf4a31aebe6cfc_2016_149914-Disclosures_and_Contributions.pdf]

Haematologica  
HAEMATOL/2016/149914  
Version 3

Uncoupling of the Hippo and Rho pathways allows megakaryocytes to escape the tetraploid checkpoint

Anita Roy, Larissa Lordier, Catherine Pioche-Durieu, Sylvie Souquere, Lydia Roy, Philippe Rameau, Valérie Lapierre, Eric Le Cam, Isabelle Plo, Najet Debili, Hana Raslova, and William Vainchenker

Disclosures: none

Contributions: A. R., L. L., H.R and W.V. conceived and designed the study, interpreted the data and wrote the paper. A. R. L. L., and L.R designed and performed experiments of cell and molecular biology. C.P.D, S.S. and E.L.C performed the ultrastructural studies. N.D and I.P. analyzed the data and provided essential reagents. P.R performed the cell sorting experiments. V.L. provided essential reagents.
